# Supplementary material for: Application of machine learning in developing a quantitative structure–property relationship model for predicting the thermal decomposition temperature of nitrogen-rich energetic ionic salts
Source: Royal Society of Chemistry journal article supplement (doi:10.1039/d4ra05875e), 2024-01-01
Supplement: d4ra05875e1.pdf [file d4ra05875e1.pdf]

**Supplementary Material for**

**Application of Machine Learning in Developing  
Quantitative Structure-Property Relationship for  
Thermal Decomposition Temperature of Nitrogen-  
Rich Energetic Ionic Salts**

Yunling Zhang<sup>a</sup>, Liang Fan<sup>b</sup>, Chao Su<sup>c</sup>, Zhenyu Shu<sup>d,\*</sup>, Haijie Zhang<sup>b,\*</sup>

<sup>a</sup> *Beiyuan Campus, Beijing Vocational college of Agriculture, Beijing, 100012, China*

<sup>b</sup> *State Key Laboratory of Environmental Criteria and Risk Assessment, Chinese Research Academy of Environmental Sciences, Beijing 100012, China*

<sup>c</sup> *Taiji Computer Co., Ltd., Beijing, 100012, China*

<sup>d</sup> *School of Information Science and Engineering, Ningbo Institute of Technology, Zhejiang University, Ningbo, 315100, China*

\*Corresponding author: shuzhenyu@nit.zju.edu.cn; zhanghaijie@craes.org.cn

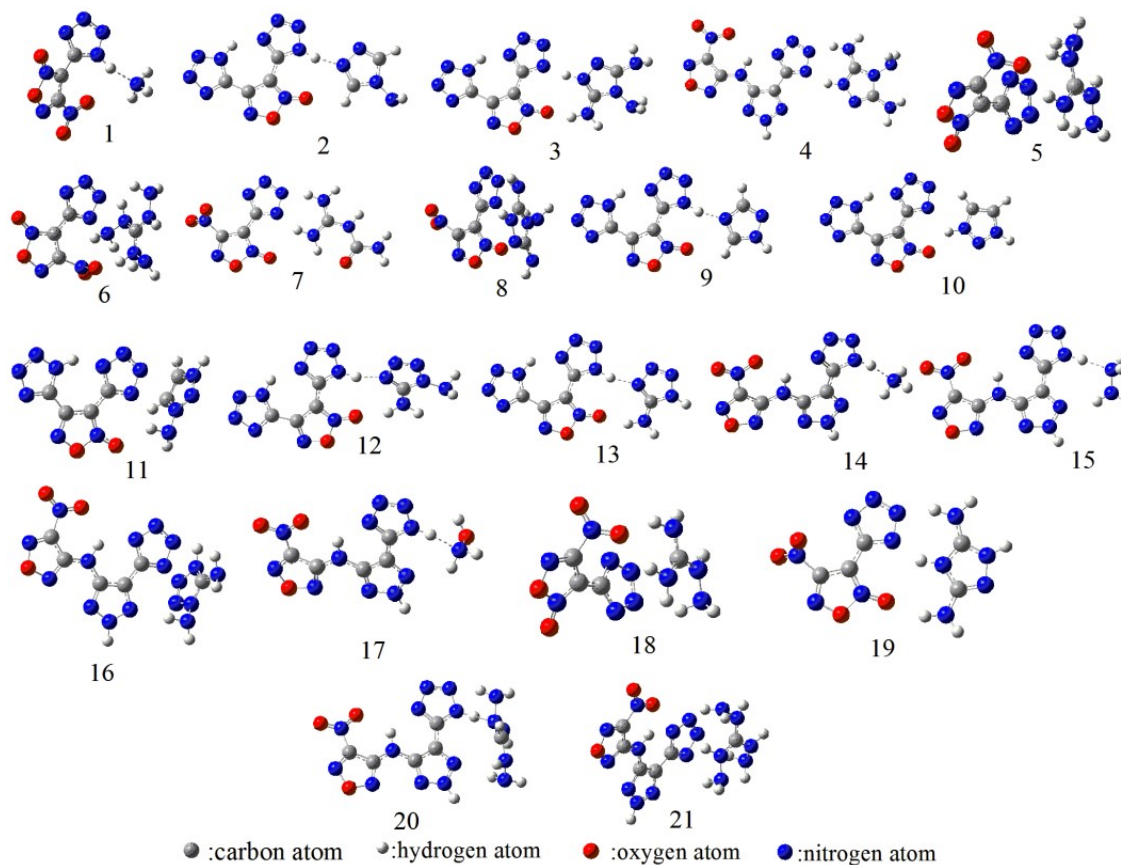

**Figure S1.** Optimized geometries of 21 nitrogen-rich energetic ionic salts at the M06-2X/6-311++G(3df,3pd) level of theory with the number referenced to Table 1.

**Table S1.** The values of  $RMSE$  and  $R^2$  with different sets of descriptors.

| Number of descriptors | 7      | 8      | 9      | 10     | 11     | 12     | 13     |
|-----------------------|--------|--------|--------|--------|--------|--------|--------|
| $RMSE$                | 32.41  | 64.42  | 30.39  | 39.03  | 27.76  | 16.89  | 15.72  |
| $R^2$                 | 61.77% | 50.89% | 58.39% | 14.08% | 68.38% | 92.34% | 96.31% |

**Table S2.** The correlation coefficients between each descriptor and  $T_d$ .

| Descriptors | $\mu$ | $E_{HOMO}$ | $E_{LUMO}$ | $\Delta E$ | $OB$ | $A_{NICS(0)F}$ | $A_{NICS(1)Z}$ | $\Delta V_{(0.003)}$ | $\sigma_+^2$ | $I_a$ | $A_a$ | $\alpha$ | $WBO$ |
|-------------|-------|------------|------------|------------|------|----------------|----------------|----------------------|--------------|-------|-------|----------|-------|
| $R$         | 0.52  | 0.06       | 0.61       | 0.45       | 0.67 | 0.66           | 0.62           | 0.59                 | 0.26         | 0.09  | 0.6   | 0.54     | 0.72  |

**Table S3.** The values of quantum chemical parameters expressed in different ways for 21 nitrogen-rich energetic salts at the level of M06-2X/6-311++G(3df,3pd) in the QSPR model. The number of energetic salts is referenced to Table 1.

|    | $A_{\text{NICS}(0)}$<br>F | $A_{\text{NICS}(1)\text{F}}$ | $A_{\text{NICS}(0)}$<br>Z | $A_{\text{NICS}(1)\text{Z}}$ | $\sigma_{\text{tot}}^2/$<br>(kcal mol <sup>-1</sup> ) <sup>2</sup> | $\sigma_+^2/$<br>(kcal mol <sup>-1</sup> ) <sup>2</sup> | $\sigma_-^2/$<br>(kcal mol <sup>-1</sup> ) <sup>2</sup> | $I_v/\text{ev}$ | $I_a/\text{ev}$ | $A_v/\text{ev}$ | $A_a/\text{ev}$ |
|----|---------------------------|------------------------------|---------------------------|------------------------------|--------------------------------------------------------------------|---------------------------------------------------------|---------------------------------------------------------|-----------------|-----------------|-----------------|-----------------|
| 1  | -13.33                    | -7.23                        | -12.02                    | -13.35                       | 345.84                                                             | 221.08                                                  | 124.75                                                  | 9.94            | 8.98            | 1.92            | 2.63            |
| 2  | -10.95                    | -7.02                        | -12.06                    | -13.23                       | 444.20                                                             | 293.53                                                  | 150.67                                                  | 9.80            | 8.88            | 1.26            | 1.78            |
| 3  | -11.26                    | -7.18                        | -11.69                    | -13.92                       | 713.04                                                             | 495.31                                                  | 217.74                                                  | 9.12            | 8.45            | 0.82            | 1.82            |
| 4  | -12.32                    | -9.67                        | -11.27                    | -13.22                       | 645.91                                                             | 489.94                                                  | 155.98                                                  | 8.03            | 7.68            | 0.78            | 1.86            |
| 5  | -13.34                    | -6.84                        | -12.44                    | -14.73                       | 363.42                                                             | 234.41                                                  | 129.02                                                  | 9.08            | 8.48            | 2.70            | 2.70            |
| 6  | -13.78                    | -6.66                        | -11.80                    | -14.31                       | 519.51                                                             | 259.24                                                  | 260.26                                                  | 8.77            | 8.24            | 1.70            | 2.67            |
| 7  | -13.70                    | -7.06                        | -11.83                    | -14.16                       | 778.45                                                             | 614.82                                                  | 163.62                                                  | 8.86            | 8.30            | 0.70            | 1.46            |
| 8  | -13.81                    | -7.29                        | -11.08                    | -14.05                       | 595.55                                                             | 415.25                                                  | 180.30                                                  | 9.05            | 8.35            | 0.85            | 1.93            |
| 9  | -11.11                    | -7.02                        | -11.97                    | -13.15                       | 359.98                                                             | 240.87                                                  | 119.12                                                  | 10.02           | 9.17            | 1.44            | 1.95            |
| 10 | -11.38                    | -7.05                        | -11.19                    | -13.88                       | 848.41                                                             | 651.07                                                  | 197.34                                                  | 9.12            | 8.55            | 0.96            | 1.68            |
| 11 | -11.29                    | -7.15                        | -12.15                    | -14.48                       | 854.47                                                             | 656.95                                                  | 197.52                                                  | 8.91            | 8.41            | 0.95            | 1.78            |
| 12 | -11.10                    | -7.15                        | -12.00                    | -13.23                       | 373.09                                                             | 254.36                                                  | 118.73                                                  | 9.97            | 9.41            | 1.52            | 2.14            |
| 13 | -11.18                    | -7.15                        | -11.90                    | -13.17                       | 462.83                                                             | 350.53                                                  | 112.30                                                  | 10.10           | 9.23            | 1.59            | 2.21            |
| 14 | -12.13                    | -9.85                        | -11.53                    | -12.63                       | 337.99                                                             | 237.42                                                  | 100.57                                                  | 9.01            | 8.70            | 1.24            | 1.83            |
| 15 | -12.13                    | -9.83                        | -11.43                    | -12.64                       | 351.00                                                             | 253.29                                                  | 97.71                                                   | 9.01            | 8.74            | 1.24            | 1.84            |
| 16 | -12.26                    | -9.68                        | -10.74                    | -13.75                       | 613.64                                                             | 436.67                                                  | 176.98                                                  | 8.28            | 7.81            | 1.56            | 2.98            |
| 17 | -12.10                    | -9.82                        | -11.28                    | -12.48                       | 349.80                                                             | 264.09                                                  | 85.72                                                   | 9.11            | 8.75            | 1.31            | 1.89            |
| 18 | -13.33                    | -6.81                        | -12.58                    | -14.96                       | 483.25                                                             | 338.45                                                  | 144.80                                                  | 9.04            | 8.47            | 1.69            | 2.66            |

|    |        |       |        |        |        |        |        |      |      |      |      |
|----|--------|-------|--------|--------|--------|--------|--------|------|------|------|------|
| 19 | -13.89 | -7.20 | -11.93 | -14.19 | 524.87 | 369.49 | 155.38 | 9.16 | 7.77 | 0.99 | 2.23 |
| 20 | -12.21 | -9.75 | -11.45 | -12.68 | 341.81 | 249.80 | 92.00  | 9.06 | 7.95 | 2.44 | 2.44 |
| 21 | -12.18 | -9.62 | -11.62 | -14.14 | 424.11 | 320.33 | 103.77 | 8.45 | 7.84 | 2.91 | 2.91 |

---

$A_{\text{NICS}(0)\text{F}}$ : index of aromaticity calculated at central of the furazan (furoxan)

$A_{\text{NICS}(1)\text{F}}$ : index of aromaticity calculated at 1.0 Å out of the furazan (furoxan)

$A_{\text{NICS}(0)\text{FZ}}$ : index of aromaticity calculated at central of the tetrazole

$A_{\text{NICS}(1)\text{Z}}$ : index of aromaticity calculated at 1.0 Å out of the tetrazole

$\sigma_{\text{tot}}^2/(\text{kcal mol}^{-1})^2$ : total ESP variance

$\sigma_+^2/(\text{kcal mol}^{-1})^2$ : positive ESP variance

$\sigma_-^2/(\text{kcal mol}^{-1})^2$ : negative ESP variance

$I_{\text{v}}/\text{ev}$ : vertical ionization potential

$I_{\text{a}}/\text{ev}$ : adiabatic ionization potential

$A_{\text{v}}/\text{ev}$ : vertical electron affinity

$A_{\text{a}}/\text{ev}$ : adiabatic electron affinity

**Table S4.** Quantum chemical parameters and *OB* of six new theoretically designed nitrogen-rich energetic salts at the level of M06-2X/6-311++G(3df,3pd) for the QSPR model. The number of energetic salts is referenced to Table 4.

| Number | $\mu/$<br>Debye | $E_{\text{HOMO}}/$<br>ev | $E_{\text{LUMO}}/$<br>ev | $\Delta E$ | <i>OB</i> | $A_{\text{NICS}(0)\text{F}}$ | $A_{\text{NICS}(1)\text{Z}}$ | $\Delta V_{(0.003)}/$<br>$\text{\AA}^3$ | $\sigma_+^2/$<br>(kcal mol <sup>-1</sup> ) <sup>2</sup> | $I_a/$<br>ev | $A_a/$<br>ev | $\alpha/$<br>Bohr <sup>3</sup> | <i>WBO</i> |
|--------|-----------------|--------------------------|--------------------------|------------|-----------|------------------------------|------------------------------|-----------------------------------------|---------------------------------------------------------|--------------|--------------|--------------------------------|------------|
| 1      | 11.56           | -8.15                    | -2.01                    | -6.14      | -67.1     | -12.33                       | -12.17                       | 83.31                                   | 300.55                                                  | 8.52         | 1.75         | 195.79                         | 0.69       |
| 2      | 19.24           | -7.44                    | -1.63                    | -5.81      | -63.2     | -11.34                       | -13.26                       | 89.87                                   | 585.11                                                  | 7.72         | 1.77         | 219.66                         | 0.62       |
| 3      | 7.85            | -8.29                    | -2.11                    | -6.18      | -54.8     | -11.26                       | -12.34                       | 84.34                                   | 342.62                                                  | 8.41         | 1.86         | 201.1                          | 0.67       |
| 4      | 12.83           | -8.67                    | -1.59                    | -7.08      | -64.9     | -11.47                       | -14.05                       | 70.54                                   | 332.99                                                  | 8.65         | 2.01         | 173.11                         | 0.67       |
| 5      | 13.41           | -8.55                    | -1.46                    | -7.08      | -64.3     | -11.33                       | -14.06                       | 74.35                                   | 309.47                                                  | 8.59         | 1.97         | 181.8                          | 0.68       |
| 6      | 11.77           | -8.63                    | -1.47                    | -7.16      | -63.8     | -11.33                       | -14.21                       | 74.35                                   | 243.46                                                  | 8.57         | 1.55         | 185.43                         | 0.70       |

$\mu$ /Debye: dipole moment

$E_{\text{HOMO}}$ /ev: energy of the highest occupied molecular orbital

$E_{\text{LUMO}}$ /ev: energy of the lowest unoccupied molecular orbital

$\Delta E$ : energy gap between HOMO and LUMO

*OB*: oxygen balance

$A_{\text{NICS}(0)\text{F}}$ : index of aromaticity calculated at central of the furazan (furoxan)

$A_{\text{NICS}(1)\text{Z}}$ : index of aromaticity calculated at 1.0  $\text{\AA}$  out of the tetrazole

$\Delta V_{(0.003)}/\text{\AA}^3$ : available free space per molecule in the unit cell

$\sigma_+^2/(\text{kcal mol}^{-1})^2$ : positive ESP variance

$I_a$ /ev: adiabatic ionization potential

$A_a$ /ev: adiabatic electron affinity

$\alpha$ /Bohr<sup>3</sup>: polarizability

*WBO*: wiberg bond order of the weakest chemical bond

Matrix A (17×13)

|         |         |         |         |          |         |         |          |           |         |         |          |         |
|---------|---------|---------|---------|----------|---------|---------|----------|-----------|---------|---------|----------|---------|
| -4.3929 | 0.0635  | -0.4276 | 0.4894  | 10.4118  | -0.9329 | -1.0459 | -8.0535  | -127.1806 | -0.0006 | 0.5059  | -17.7200 | 0.0947  |
| 0.2871  | 0.3835  | -0.3576 | 0.7394  | 10.0118  | -1.3729 | -0.6259 | -4.2035  | -102.3506 | -0.2406 | 0.4759  | -8.4300  | 0.0947  |
| 5.4071  | 0.2635  | 0.5724  | -0.3006 | 9.7118   | -1.2929 | -0.4759 | -0.7435  | 253.2294  | -0.1806 | -0.7341 | -8.0800  | -0.0153 |
| -0.4629 | 0.0835  | 0.3924  | -0.3206 | 6.3118   | -1.4029 | -0.3659 | -1.1235  | 53.6594   | -0.1306 | -0.2641 | -3.4300  | 0.0147  |
| -1.9529 | -0.9365 | -0.0376 | -0.9006 | -13.8882 | 1.2971  | 0.5341  | -1.9935  | -120.7206 | 0.6894  | -0.2441 | -7.1900  | -0.0553 |
| 7.6871  | -0.0365 | 0.2024  | -0.2406 | -13.8882 | 1.0271  | -0.1959 | -3.3635  | 289.4794  | 0.0694  | -0.5141 | -4.7300  | -0.0653 |
| 6.2771  | 0.1735  | 0.3124  | -0.1406 | -13.0882 | 1.1171  | -0.7959 | -0.6335  | 295.3594  | -0.0706 | -0.4141 | 0.7100   | -0.0053 |
| 0.2871  | -0.8165 | -0.0976 | -0.7106 | 0.2118   | 1.3071  | 0.4541  | 3.8965   | -107.2306 | 0.9294  | -0.0541 | 9.6100   | -0.0553 |
| -0.4629 | -0.9965 | -0.1776 | -0.8206 | 0.1118   | 1.2271  | 0.5141  | -0.0735  | -11.0606  | 0.7494  | 0.0159  | -0.7500  | -0.0453 |
| -1.1529 | 0.1035  | -0.0676 | 0.1694  | -1.8882  | 0.2771  | 1.0541  | -3.8235  | -124.1706 | 0.2194  | -0.3641 | -12.3200 | -0.0153 |
| -0.9429 | 0.1035  | -0.0676 | 0.1694  | -1.6882  | 0.2771  | 1.0441  | 0.3465   | -108.3006 | 0.2594  | -0.3541 | -3.2900  | -0.0153 |
| 2.0571  | 0.8135  | 0.2624  | 0.5594  | 0.1118   | 0.1471  | -0.0659 | 10.6965  | 75.0794   | -0.6706 | 0.7859  | 31.6000  | 0.0247  |
| -2.8529 | 0.0035  | -0.1376 | 0.1394  | 6.5118   | 0.3071  | 1.2041  | -1.3535  | -97.5006  | 0.2694  | -0.3041 | -8.2600  | 0.0047  |
| -3.5129 | 0.1135  | -0.4376 | 0.5494  | 10.9118  | -0.9229 | -1.2759 | -11.0235 | -23.1406  | -0.0106 | 0.4659  | -26.3400 | 0.1047  |
| -0.7929 | 0.0235  | 0.2924  | -0.2706 | 6.5118   | -1.4829 | -0.5059 | -3.4635  | 7.8994    | -0.7106 | 0.0359  | -9.1100  | -0.0753 |
| -1.9429 | 0.0235  | -0.1276 | 0.1494  | -8.3882  | 0.1971  | 1.0041  | 11.7165  | -111.7906 | -0.5306 | 0.2459  | 29.9700  | -0.0153 |
| -3.5329 | 0.6335  | -0.0976 | 0.7394  | -7.9882  | 0.2271  | -0.4559 | 13.1965  | -41.2606  | -0.6406 | 0.7159  | 37.7600  | 0.0247  |

Covariance matrix B (13×13)

|          |         |         |          |           |         |          |          |            |          |          |          |         |
|----------|---------|---------|----------|-----------|---------|----------|----------|------------|----------|----------|----------|---------|
| 12.2031  | 0.1767  | 0.7066  | -0.5270  | -10.5383  | 0.7264  | -0.4293  | 0.4948   | 454.9328   | -0.0668  | -0.8415  | 2.0351   | -0.0748 |
| 0.1767   | 0.2434  | 0.0281  | 0.2158   | 0.9014    | -0.2628 | -0.1394  | 0.7499   | 17.6036    | -0.2030  | 0.0800   | 2.4150   | 0.0141  |
| 0.7066   | 0.0281  | 0.0858  | -0.0576  | -0.5038   | -0.0223 | -0.0117  | 0.4479   | 31.5236    | -0.0403  | -0.0706  | 0.9492   | -0.0086 |
| -0.5270  | 0.2158  | -0.0576 | 0.2738   | 1.4025    | -0.2394 | -0.1278  | 0.3196   | -13.8412   | -0.1630  | 0.1512   | 1.5122   | 0.0226  |
| -10.5383 | 0.9014  | -0.5038 | 1.4025   | 77.7749   | -7.0953 | -2.2582  | -25.2663 | -307.9552  | -0.5422  | 0.8816   | -70.7511 | 0.2673  |
| 0.7264   | -0.2628 | -0.0223 | -0.2394  | -7.0953   | 1.0628  | 0.4221   | 2.1804   | 4.2723     | 0.2937   | -0.1008  | 5.7312   | -0.0298 |
| -0.4293  | -0.1394 | -0.0117 | -0.1278  | -2.2582   | 0.4221  | 0.6268   | 1.8257   | -49.2457   | 0.1566   | -0.1226  | 3.2534   | -0.0230 |
| 0.4948   | 0.7499  | 0.4479  | 0.3196   | -25.2663  | 2.1804  | 1.8257   | 43.1965  | -24.0923   | -1.0674  | 0.8869   | 113.8630 | -0.0925 |
| 454.9328 | 17.6036 | 31.5236 | -13.8412 | -307.9552 | 4.2723  | -49.2457 | -24.0923 | 21748.3009 | -16.9717 | -27.7790 | 16.6074  | -1.8473 |
| -0.0668  | -0.2030 | -0.0403 | -0.1630  | -0.5422   | 0.2937  | 0.1566   | -1.0674  | -16.9717   | 0.2408   | -0.0976  | -3.3332  | -0.0080 |
| -0.8415  | 0.0800  | -0.0706 | 0.1512   | 0.8816    | -0.1008 | -0.1226  | 0.8869   | -27.7790   | -0.0976  | 0.2093   | 3.2514   | 0.0151  |
| 2.0351   | 2.4150  | 0.9492  | 1.5122   | -70.7511  | 5.7312  | 3.2534   | 113.8630 | 16.6074    | -3.3332  | 3.2514   | 309.9877 | -0.1759 |
| -0.0748  | 0.0141  | -0.0086 | 0.0226   | 0.2673    | -0.0298 | -0.0230  | -0.0925  | -1.8473    | -0.0080  | 0.0151   | -0.1759  | 0.0031  |

Eigenvectors C (13×13)

|          |          |          |          |          |          |          |          |          |          |          |          |          |
|----------|----------|----------|----------|----------|----------|----------|----------|----------|----------|----------|----------|----------|
| 0.02092  | 0.00775  | -0.06726 | 0.85892  | -0.48445 | -0.10601 | -0.06291 | -0.06919 | 0.04859  | 0.01158  | -0.00660 | 0.00396  | 0.00066  |
| 0.00081  | 0.00581  | 0.03217  | -0.07113 | -0.10423 | -0.39199 | 0.43622  | -0.12753 | -0.30337 | 0.42414  | 0.12514  | 0.01099  | 0.57887  |
| 0.00145  | 0.00274  | 0.00354  | 0.04069  | 0.08212  | -0.09530 | -0.17020 | 0.14201  | -0.26580 | 0.71311  | 0.14197  | 0.00168  | -0.57795 |
| -0.00064 | 0.00320  | 0.02882  | -0.11120 | -0.18657 | -0.29518 | 0.60794  | -0.27901 | -0.02891 | -0.28001 | -0.02333 | -0.10608 | -0.57130 |
| -0.01421 | -0.24474 | 0.95968  | 0.09024  | -0.00397 | 0.09383  | 0.02947  | 0.01652  | -0.00144 | 0.01237  | -0.02534 | 0.00306  | 0.00009  |
| 0.00020  | 0.02071  | -0.09801 | 0.12349  | 0.06945  | 0.69938  | 0.48052  | -0.16163 | 0.16468  | 0.34340  | -0.27534 | 0.05361  | 0.00201  |
| -0.00226 | 0.01166  | -0.03689 | 0.25900  | 0.29509  | -0.02053 | 0.41374  | 0.77792  | -0.02339 | -0.16102 | 0.20265  | -0.00174 | -0.00547 |
| -0.00109 | 0.33512  | 0.08960  | 0.33261  | 0.71248  | -0.24079 | -0.00590 | -0.39400 | 0.20867  | 0.00964  | 0.06628  | -0.01096 | 0.00358  |
| 0.99967  | -0.00400 | 0.01489  | -0.01583 | 0.01138  | 0.00369  | 0.00291  | 0.00238  | 0.00010  | -0.00204 | 0.00143  | -0.00028 | -0.00001 |
| -0.00078 | -0.00858 | -0.03025 | 0.11235  | 0.07783  | 0.40740  | -0.01555 | -0.26058 | -0.60941 | -0.24464 | 0.54565  | -0.13126 | 0.00418  |
| -0.00128 | 0.00847  | 0.02411  | -0.13102 | -0.19647 | 0.07222  | 0.04908  | -0.04294 | 0.61838  | 0.15283  | 0.72161  | -0.08705 | 0.00731  |
| 0.00082  | 0.90937  | 0.22778  | -0.10881 | -0.26119 | 0.10623  | -0.01059 | 0.14321  | -0.08984 | -0.01374 | -0.03011 | 0.00423  | -0.00130 |
| -0.00009 | -0.00067 | 0.00344  | -0.01376 | -0.01839 | -0.00772 | 0.03807  | -0.06229 | -0.03248 | -0.07445 | 0.14938  | 0.98019  | -0.06619 |

The four-dimensional new matrix D (13×4)

|          |          |          |          |
|----------|----------|----------|----------|
| 0.02092  | 0.00775  | -0.06726 | 0.85892  |
| 0.00081  | 0.00581  | 0.03217  | -0.07113 |
| 0.00145  | 0.00274  | 0.00354  | 0.04069  |
| -0.00064 | 0.00320  | 0.02882  | -0.11120 |
| -0.01421 | -0.24474 | 0.95968  | 0.09024  |
| 0.00020  | 0.02071  | -0.09801 | 0.12349  |
| -0.00226 | 0.01166  | -0.03689 | 0.25900  |
| -0.00109 | 0.33512  | 0.08960  | 0.33261  |
| 0.99967  | -0.00400 | 0.01489  | -0.01583 |
| -0.00078 | -0.00858 | -0.03025 | 0.11235  |
| -0.00128 | 0.00847  | 0.02411  | -0.13102 |
| 0.00082  | 0.90937  | 0.22778  | -0.10881 |
| -0.00009 | -0.00067 | 0.00344  | -0.01376 |

**Matrix E (17×4)**

|          |          |          |         |
|----------|----------|----------|---------|
| 235.1789 | 175.4298 | 3.5912   | -1.0244 |
| 260.1072 | 185.2034 | 5.7752   | 2.8195  |
| 615.6822 | 185.3635 | 10.7518  | 3.0514  |
| 416.1057 | 191.0504 | 5.9469   | 0.1959  |
| 242.0330 | 193.0197 | -17.2427 | 0.7501  |
| 652.3076 | 193.2288 | -11.2313 | 1.4288  |
| 658.1479 | 198.8592 | -8.7673  | 0.3174  |
| 255.3721 | 206.7837 | 0.7018   | 3.8144  |
| 351.4921 | 195.6657 | -0.6237  | 1.4435  |
| 238.4275 | 184.8219 | -7.0077  | 2.3011  |
| 254.2966 | 194.3198 | -4.1638  | 2.6533  |
| 437.6738 | 228.3739 | 9.1115   | 1.4971  |
| 264.9339 | 187.1676 | 2.6983   | 1.6042  |
| 339.1930 | 166.0618 | 3.3416   | -1.9853 |
| 370.3489 | 185.2363 | 4.0129   | 0.3399  |
| 250.8966 | 230.0309 | -1.9395  | 1.2255  |
| 321.3724 | 237.2126 | 1.6109   | -2.1327 |

**Matrix F(4×4)**

|          |          |          |        |
|----------|----------|----------|--------|
| 221.6063 | 129.3751 | 6.8117   | 0.9851 |
| 294.7612 | 204.0157 | -13.1142 | 3.9755 |
| 496.6123 | 225.0615 | -3.6404  | 5.9945 |
| 491.1942 | 252.4864 | 4.7390   | 4.7025 |



Training set (17×13)

|       |       |       |       |       |        |        |       |        |      |      |        |      |
|-------|-------|-------|-------|-------|--------|--------|-------|--------|------|------|--------|------|
| 6.81  | -8.37 | -2.46 | -5.91 | -44.4 | -13.34 | -14.73 | 65.55 | 234.41 | 8.48 | 2.70 | 158.41 | 0.77 |
| 11.49 | -8.05 | -2.39 | -5.66 | -44.8 | -13.78 | -14.31 | 69.40 | 259.24 | 8.24 | 2.67 | 167.70 | 0.77 |
| 16.61 | -8.17 | -1.46 | -6.70 | -45.1 | -13.70 | -14.16 | 72.86 | 614.82 | 8.30 | 1.46 | 168.05 | 0.66 |
| 10.74 | -8.35 | -1.64 | -6.72 | -48.5 | -13.81 | -14.05 | 72.48 | 415.25 | 8.35 | 1.93 | 172.70 | 0.69 |
| 9.25  | -9.37 | -2.07 | -7.30 | -68.7 | -11.11 | -13.15 | 71.61 | 240.87 | 9.17 | 1.95 | 168.94 | 0.62 |
| 18.89 | -8.47 | -1.83 | -6.64 | -68.7 | -11.38 | -13.88 | 70.24 | 651.07 | 8.55 | 1.68 | 171.40 | 0.61 |
| 17.48 | -8.26 | -1.72 | -6.54 | -67.9 | -11.29 | -14.48 | 72.97 | 656.95 | 8.41 | 1.78 | 176.84 | 0.67 |
| 11.49 | -9.25 | -2.13 | -7.11 | -54.6 | -11.10 | -13.23 | 77.50 | 254.36 | 9.41 | 2.14 | 185.74 | 0.62 |
| 10.74 | -9.43 | -2.21 | -7.22 | -54.7 | -11.18 | -13.17 | 73.53 | 350.53 | 9.23 | 2.21 | 175.38 | 0.63 |
| 10.05 | -8.33 | -2.10 | -6.23 | -56.7 | -12.13 | -12.63 | 69.78 | 237.42 | 8.70 | 1.83 | 163.81 | 0.66 |
| 10.26 | -8.33 | -2.10 | -6.23 | -56.5 | -12.13 | -12.64 | 73.95 | 253.29 | 8.74 | 1.84 | 172.84 | 0.66 |
| 13.26 | -7.62 | -1.77 | -5.84 | -54.7 | -12.26 | -13.75 | 84.30 | 436.67 | 7.81 | 2.98 | 207.73 | 0.70 |
| 8.35  | -8.43 | -2.17 | -6.26 | -48.3 | -12.10 | -12.48 | 72.25 | 264.09 | 8.75 | 1.89 | 167.87 | 0.68 |
| 7.69  | -8.32 | -2.47 | -5.85 | -43.9 | -13.33 | -14.96 | 62.58 | 338.45 | 8.47 | 2.66 | 149.79 | 0.78 |
| 10.41 | -8.41 | -1.74 | -6.67 | -48.3 | -13.89 | -14.19 | 70.14 | 369.49 | 7.77 | 2.23 | 167.02 | 0.60 |
| 9.26  | -8.41 | -2.16 | -6.25 | -63.2 | -12.21 | -12.68 | 85.32 | 249.80 | 7.95 | 2.44 | 206.10 | 0.66 |
| 7.67  | -7.80 | -2.13 | -5.66 | -62.8 | -12.18 | -14.14 | 86.80 | 320.33 | 7.84 | 2.91 | 213.89 | 0.70 |

Testing set (4×13)

|       |       |       |       |       |        |        |       |        |      |      |        |      |
|-------|-------|-------|-------|-------|--------|--------|-------|--------|------|------|--------|------|
| 6.25  | -9.16 | -2.77 | -6.39 | -29.6 | -13.33 | -13.35 | 53.04 | 221.08 | 8.98 | 2.63 | 116.30 | 0.64 |
| 13.62 | -9.16 | -1.88 | -7.28 | -67.9 | -10.95 | -13.23 | 75.94 | 293.53 | 8.88 | 1.78 | 179.84 | 0.62 |
| 20.37 | -8.49 | -1.46 | -7.03 | -66.6 | -11.26 | -13.92 | 82.04 | 495.31 | 8.45 | 1.82 | 201.92 | 0.56 |
| 18.36 | -7.38 | -1.61 | -5.77 | -65.4 | -12.32 | -13.22 | 92.30 | 489.94 | 7.68 | 1.86 | 228.61 | 0.61 |

Latent

|          |
|----------|
| 21762.47 |
| 371.19   |
| 55.51    |
| 2.83     |
| 1.34     |
| 0.54     |
| 0.21     |
| 0.08     |
| 0.02     |
| 0.02     |
| 0.01     |
| 0.00     |
| 0.00     |

**Table S5.** Geometry of No.1. Units are in angstrom.

| Atom | X      | Y      | Z      |
|------|--------|--------|--------|
| O    | -2.729 | 0.993  | 0.457  |
| O    | -1.327 | 2.719  | 0.649  |
| O    | -1.892 | -2.702 | -0.689 |
| O    | 0.169  | -2.100 | -0.493 |
| N    | -2.664 | -0.306 | 0.146  |
| N    | -1.435 | 1.560  | 0.387  |
| N    | 1.862  | 0.114  | 0.137  |
| N    | 2.959  | 0.771  | -0.213 |
| N    | 2.589  | 1.889  | -0.727 |
| N    | 1.254  | 1.993  | -0.729 |
| N    | -1.028 | -1.906 | -0.464 |
| C    | -1.426 | -0.549 | -0.104 |
| C    | -0.591 | 0.587  | 0.029  |
| C    | 0.813  | 0.877  | -0.191 |
| N    | 2.626  | -2.376 | 1.163  |
| H    | 1.966  | -0.840 | 0.558  |
| H    | 2.192  | -3.130 | 0.643  |
| H    | 2.539  | -2.595 | 2.148  |
| H    | 3.616  | -2.382 | 0.941  |

**Table S6.** Geometry of No.2. Units are in angstrom.

| Atom | X | Y | Z |
|------|---|---|---|
|------|---|---|---|

---

|   |        |        |        |
|---|--------|--------|--------|
| O | 3.762  | 0.658  | 0.491  |
| O | 2.714  | 2.627  | 0.255  |
| O | 2.099  | -2.842 | -0.651 |
| O | 0.473  | -2.064 | 0.523  |
| N | 3.463  | -0.644 | 0.374  |
| N | 2.603  | 1.435  | 0.212  |
| N | -0.376 | 0.202  | -1.374 |
| N | -1.551 | 0.796  | -1.484 |
| N | -1.595 | 1.839  | -0.686 |
| N | -0.450 | 1.964  | -0.029 |
| N | 1.548  | -1.973 | -0.047 |
| C | 2.216  | -0.680 | 0.062  |
| C | 1.613  | 0.589  | -0.054 |
| C | 0.278  | 0.948  | -0.482 |
| N | -1.889 | -0.393 | 1.348  |
| H | -1.938 | 0.586  | 1.593  |
| H | -0.963 | -0.799 | 1.358  |
| N | -3.876 | -0.193 | 0.189  |
| N | -2.468 | -1.975 | -0.227 |
| H | -2.973 | -2.148 | -1.081 |
| H | -1.500 | -2.270 | -0.245 |
| H | -4.404 | -0.464 | -0.626 |
| C | -2.723 | -0.827 | 0.411  |
| N | -4.150 | 1.092  | 0.645  |

|   |        |       |       |
|---|--------|-------|-------|
| H | -4.291 | 1.095 | 1.646 |
| H | -3.420 | 1.737 | 0.332 |

**Table S7.** Geometry of No.3. Units are in angstrom.

| Atom | X      | Y      | Z      |
|------|--------|--------|--------|
| O    | 3.978  | -0.588 | -0.365 |
| O    | 3.002  | -2.560 | 0.069  |
| O    | 2.165  | 2.952  | 0.304  |
| O    | 0.574  | 1.967  | -0.756 |
| N    | 3.625  | 0.704  | -0.404 |
| N    | 2.844  | -1.377 | -0.027 |
| N    | -0.230 | -0.118 | 1.341  |
| N    | -1.381 | -0.755 | 1.481  |
| N    | -1.358 | -1.872 | 0.793  |
| N    | -0.188 | -2.008 | 0.185  |
| N    | 1.649  | 1.992  | -0.183 |
| C    | 2.369  | 0.724  | -0.128 |
| C    | 1.814  | -0.549 | 0.117  |
| C    | 0.483  | -0.919 | 0.547  |
| N    | -1.664 | 0.085  | -1.575 |
| H    | -1.628 | -0.887 | -1.843 |
| H    | -0.768 | 0.552  | -1.514 |
| N    | -3.686 | -0.294 | -0.513 |
| N    | -2.434 | 1.576  | 0.009  |

|   |        |        |        |
|---|--------|--------|--------|
| H | -1.468 | 1.882  | 0.078  |
| H | -4.271 | -0.022 | 0.264  |
| C | -2.587 | 0.429  | -0.680 |
| N | -3.824 | -1.598 | -0.974 |
| H | -3.869 | -1.624 | -1.984 |
| H | -3.078 | -2.177 | -0.587 |
| N | -3.215 | 1.681  | 1.170  |
| H | -3.391 | 2.657  | 1.357  |
| H | -2.712 | 1.240  | 1.940  |

**Table S8.** Geometry of No.4. Units are in angstrom.

| Atom | X     | Y      | Z      |
|------|-------|--------|--------|
| O    | 4.138 | -0.688 | 0.070  |
| O    | 4.155 | 1.556  | 0.023  |
| O    | 0.378 | -1.943 | -1.261 |
| O    | 0.371 | -2.273 | 0.864  |
| N    | 3.222 | -1.675 | 0.040  |
| N    | 3.476 | 0.570  | -0.003 |

---

|   |        |        |        |
|---|--------|--------|--------|
| N | -0.157 | 0.888  | 0.106  |
| N | -0.864 | 2.007  | -0.033 |
| N | -0.076 | 3.002  | -0.337 |
| N | 1.176  | 2.582  | -0.409 |
| N | 0.848  | -1.837 | -0.158 |
| C | 2.092  | -1.076 | -0.053 |
| C | 2.172  | 0.328  | -0.086 |
| C | 1.094  | 1.286  | -0.134 |
| N | -2.646 | 0.263  | 1.410  |
| H | -2.619 | 1.274  | 1.419  |
| N | -3.458 | 0.408  | -0.750 |
| N | -2.473 | -1.546 | -0.031 |
| H | -1.733 | -1.931 | 0.545  |
| H | -3.543 | -0.039 | -1.650 |
| C | -2.828 | -0.273 | 0.194  |
| N | -3.796 | 1.755  | -0.658 |
| H | -4.506 | 1.892  | 0.051  |
| H | -2.948 | 2.289  | -0.462 |
| N | -2.656 | -2.051 | -1.323 |
| H | -3.139 | -2.938 | -1.262 |
| H | -1.748 | -2.189 | -1.753 |
| N | -1.779 | -0.305 | 2.343  |
| H | -0.855 | -0.422 | 1.933  |
| H | -2.160 | -1.167 | 2.708  |

**Table S9.** Geometry of No.5. Units are in angstrom.

| Atom | X      | Y      | Z      |
|------|--------|--------|--------|
| O    | 2.426  | -2.602 | 0.085  |
| O    | 0.291  | -1.926 | 0.133  |
| O    | 5.489  | 0.015  | 0.625  |
| O    | 4.514  | 0.899  | -1.089 |
| N    | 3.647  | -2.038 | 0.035  |
| N    | 1.456  | -1.591 | 0.079  |
| N    | 1.968  | 2.010  | 0.303  |
| N    | 0.976  | 2.882  | 0.302  |
| N    | -0.147 | 2.259  | 0.074  |
| N    | 0.069  | 0.961  | -0.079 |
| N    | 4.589  | 0.136  | -0.163 |
| C    | 3.448  | -0.769 | -0.008 |
| C    | 2.078  | -0.422 | 0.019  |
| C    | 1.383  | 0.839  | 0.065  |
| O    | -4.587 | -1.821 | -0.138 |
| N    | -2.870 | 1.987  | -0.031 |
| N    | -2.381 | -0.257 | -0.099 |
| N    | -4.601 | 0.469  | -0.016 |
| N    | -6.567 | -0.733 | 0.013  |
| C    | -3.245 | 0.716  | -0.050 |
| C    | -5.208 | -0.794 | -0.043 |
| H    | -1.854 | 2.262  | 0.002  |

|   |        |        |        |
|---|--------|--------|--------|
| H | -3.558 | 2.709  | 0.082  |
| H | -1.361 | -0.012 | -0.110 |
| H | -2.720 | -1.208 | -0.138 |
| H | -5.198 | 1.277  | -0.082 |
| H | -7.044 | 0.068  | 0.387  |
| H | -7.030 | -1.623 | 0.103  |

**Table S10.** Geometry of No.6. Units are in angstrom.

| Atom | X      | Y      | Z      |
|------|--------|--------|--------|
| O    | 1.886  | 2.511  | -0.149 |
| O    | -0.173 | 1.733  | -0.562 |
| O    | 5.129  | 0.063  | -0.090 |
| O    | 3.893  | -0.884 | 1.409  |
| N    | 3.106  | 2.012  | 0.120  |
| N    | 0.985  | 1.452  | -0.299 |
| N    | 1.727  | -2.105 | -0.462 |
| N    | 0.803  | -3.040 | -0.589 |
| N    | -0.382 | -2.500 | -0.472 |
| N    | -0.275 | -1.194 | -0.259 |
| N    | 4.104  | -0.112 | 0.512  |
| C    | 2.967  | 0.734  | 0.144  |
| C    | 1.640  | 0.317  | -0.116 |
| C    | 1.037  | -0.984 | -0.262 |
| C    | -3.236 | 1.313  | 0.198  |



|   |        |        |        |
|---|--------|--------|--------|
| C | -3.190 | -0.869 | 0.480  |
| N | -2.956 | 0.112  | -0.420 |
| H | -3.884 | -0.650 | 2.440  |
| N | -3.644 | -0.244 | 1.553  |
| N | -3.675 | 1.129  | 1.405  |
| N | -2.456 | 0.006  | -1.705 |
| H | -1.498 | -0.337 | -1.616 |
| H | -3.028 | -0.647 | -2.229 |
| N | -3.105 | 2.480  | -0.469 |
| N | -3.064 | -2.180 | 0.245  |
| H | -3.312 | -2.776 | 1.021  |
| H | -2.174 | -2.481 | -0.207 |
| H | -3.054 | 3.290  | 0.129  |
| H | -2.394 | 2.451  | -1.189 |

**Table S11.** Geometry of No.7. Units are in angstrom.

| Atom | X      | Y      | Z      |
|------|--------|--------|--------|
| O    | -2.096 | -2.500 | -0.056 |
| O    | 0.053  | -1.879 | -0.167 |
| O    | -5.051 | 0.255  | -0.644 |
| O    | -4.124 | 1.003  | 1.161  |
| N    | -3.303 | -1.905 | 0.013  |
| N    | -1.111 | -1.516 | -0.086 |
| N    | -1.556 | 2.098  | -0.252 |

---

|   |        |        |        |
|---|--------|--------|--------|
| N | -0.552 | 2.955  | -0.293 |
| N | 0.576  | 2.311  | -0.171 |
| N | 0.350  | 1.012  | -0.048 |
| N | -4.187 | 0.298  | 0.190  |
| C | -3.073 | -0.641 | 0.032  |
| C | -1.694 | -0.332 | -0.031 |
| C | -0.975 | 0.912  | -0.099 |
| C | 3.489  | -1.306 | 0.035  |
| C | 3.659  | 0.868  | 0.059  |
| N | 2.766  | -0.134 | -0.016 |
| H | 5.751  | 0.735  | 0.214  |
| N | 4.853  | 0.292  | 0.147  |
| N | 4.766  | -1.089 | 0.139  |
| N | 2.900  | -2.516 | -0.070 |
| N | 3.359  | 2.160  | 0.046  |
| H | 4.088  | 2.846  | 0.099  |
| H | 2.365  | 2.452  | -0.050 |
| H | 3.464  | -3.308 | 0.185  |
| H | 1.906  | -2.578 | 0.085  |
| H | 1.720  | 0.059  | -0.045 |

**Table S12.** Geometry of No.8. Units are in angstrom.

| Atom | X      | Y      | Z      |
|------|--------|--------|--------|
| O    | -0.761 | -2.681 | 0.000  |
| O    | 1.230  | -1.667 | 0.000  |
| N    | -3.559 | 0.999  | -0.000 |
| N    | -4.861 | 1.247  | -0.000 |
| N    | -5.455 | 0.107  | -0.000 |
| N    | -4.570 | -0.900 | -0.000 |
| N    | -0.946 | 1.952  | 0.000  |
| N    | -0.062 | 2.957  | 0.000  |
| N    | 1.134  | 2.499  | 0.000  |
| N    | 1.058  | 1.171  | 0.000  |
| N    | -2.063 | -2.322 | -0.000 |
| N    | 0.017  | -1.548 | 0.000  |
| C    | -3.388 | -0.329 | -0.000 |
| C    | -2.108 | -1.024 | 0.000  |
| C    | -0.780 | -0.494 | 0.000  |
| C    | -0.236 | 0.841  | 0.000  |
| H    | -2.835 | 1.725  | -0.000 |
| C    | 4.121  | -1.037 | 0.000  |
| C    | 4.684  | 0.991  | -0.000 |
| N    | 3.599  | 0.170  | 0.000  |

|   |       |        |        |
|---|-------|--------|--------|
| H | 1.961 | 0.616  | 0.000  |
| H | 3.580 | -1.967 | 0.000  |
| H | 6.145 | -1.661 | -0.000 |
| H | 4.612 | 2.065  | -0.000 |
| N | 5.831 | 0.359  | -0.000 |
| N | 5.452 | -0.931 | -0.000 |

**Table S13.** Geometry of No.9. Units are in angstrom.

| Atom | X      | Y      | Z      |
|------|--------|--------|--------|
| O    | -0.818 | -2.725 | -0.000 |
| O    | 1.217  | -1.818 | -0.000 |
| N    | -3.445 | 1.061  | 0.000  |
| N    | -4.731 | 1.378  | 0.000  |
| N    | -5.388 | 0.271  | 0.000  |
| N    | -4.560 | -0.782 | 0.000  |
| N    | -0.867 | 1.929  | -0.000 |
| N    | 0.050  | 2.884  | -0.000 |
| N    | 1.233  | 2.344  | -0.000 |
| N    | 1.130  | 1.018  | -0.000 |
| N    | -2.102 | -2.322 | -0.000 |
| N    | -0.003 | -1.617 | -0.000 |
| C    | -3.349 | -0.274 | 0.000  |
| C    | -2.100 | -1.024 | -0.000 |
| C    | -0.755 | -0.534 | -0.000 |

|   |        |        |        |
|---|--------|--------|--------|
| C | -0.177 | 0.789  | -0.000 |
| H | -2.660 | 1.739  | 0.000  |
| N | 4.404  | -1.216 | 0.000  |
| H | 2.482  | -0.539 | -0.000 |
| H | 3.358  | 1.829  | -0.000 |
| H | 6.390  | -1.081 | 0.000  |
| N | 5.528  | -0.555 | 0.000  |
| N | 3.498  | -0.296 | -0.000 |
| C | 5.355  | 0.788  | 0.000  |
| C | 4.000  | 0.959  | -0.000 |
| H | 6.172  | 1.483  | 0.000  |

**Table S14.** Geometry of No.10. Units are in angstrom.

| Atom | X      | Y      | Z      |
|------|--------|--------|--------|
| O    | -1.680 | -2.852 | -0.102 |
| O    | 0.521  | -2.513 | -0.005 |
| N    | -3.220 | 1.488  | 0.043  |
| N    | -4.377 | 2.133  | 0.026  |
| N    | -5.299 | 1.238  | -0.054 |
| N    | -4.775 | 0.006  | -0.091 |
| N    | -0.517 | 1.647  | 0.124  |
| N    | 0.608  | 2.343  | 0.176  |
| N    | 1.619  | 1.525  | 0.180  |
| N    | 1.191  | 0.266  | 0.130  |

|   |        |        |        |
|---|--------|--------|--------|
| N | -2.810 | -2.121 | -0.112 |
| N | -0.594 | -2.002 | -0.020 |
| C | -3.474 | 0.177  | -0.030 |
| C | -2.463 | -0.873 | -0.039 |
| C | -1.037 | -0.757 | 0.021  |
| C | -0.132 | 0.370  | 0.096  |
| H | -2.282 | 1.931  | 0.094  |
| N | 4.328  | 0.303  | 0.971  |
| H | 3.429  | -0.614 | -1.972 |
| H | 5.036  | 2.141  | 0.725  |
| N | 4.684  | 1.324  | 0.247  |
| N | 3.838  | -0.535 | 0.116  |
| C | 4.425  | 1.169  | -1.068 |
| C | 3.859  | -0.065 | -1.156 |
| H | 4.617  | 1.930  | -1.800 |
| N | 3.270  | -1.701 | 0.597  |
| H | 3.505  | -2.451 | -0.043 |
| H | 2.253  | -1.541 | 0.567  |

**Table S15.** Geometry of No.11. Units are in angstrom.

| Atom | X      | Y      | Z      |
|------|--------|--------|--------|
| O    | -0.880 | -2.623 | -0.000 |
| O    | 1.027  | -1.461 | -0.000 |
| N    | -3.958 | 0.827  | -0.000 |
| N    | -5.276 | 0.969  | 0.000  |

---

|   |        |        |        |
|---|--------|--------|--------|
| N | -5.775 | -0.216 | 0.000  |
| N | -4.812 | -1.147 | 0.000  |
| N | -1.434 | 1.976  | -0.000 |
| N | -0.642 | 3.055  | -0.000 |
| N | 0.590  | 2.706  | -0.000 |
| N | 0.634  | 1.376  | -0.000 |
| N | -2.205 | -2.364 | 0.000  |
| N | -0.191 | -1.433 | -0.000 |
| C | -3.680 | -0.482 | 0.000  |
| C | -2.348 | -1.073 | 0.000  |
| C | -1.064 | -0.442 | -0.000 |
| C | -0.628 | 0.933  | -0.000 |
| H | -3.291 | 1.607  | -0.000 |
| N | 4.175  | 1.434  | 0.000  |
| N | 3.220  | 0.455  | -0.000 |
| N | 5.153  | -0.516 | 0.000  |
| N | 6.095  | -1.541 | -0.000 |
| C | 5.327  | 0.838  | 0.000  |
| H | 6.294  | 1.311  | 0.000  |
| C | 3.814  | -0.704 | -0.000 |
| H | 3.349  | -1.673 | -0.000 |
| H | 6.674  | -1.466 | -0.827 |
| H | 6.674  | -1.466 | 0.827  |
| H | 1.579  | 0.890  | -0.000 |

**Table S16.** Geometry of No.12. Units are in angstrom.

| Atom | X      | Y      | Z      |
|------|--------|--------|--------|
| O    | -1.518 | -2.636 | 0.376  |
| O    | 0.477  | -1.649 | 0.199  |
| N    | -4.325 | 0.990  | -0.115 |
| N    | -5.624 | 1.241  | -0.107 |
| N    | -6.218 | 0.121  | 0.118  |
| N    | -5.335 | -0.875 | 0.261  |
| N    | -1.798 | 1.933  | -0.349 |
| N    | -0.955 | 2.946  | -0.506 |
| N    | 0.263  | 2.520  | -0.392 |
| N    | 0.257  | 1.213  | -0.153 |
| N    | -2.817 | -2.285 | 0.355  |
| N    | -0.750 | -1.507 | 0.202  |
| C    | -4.154 | -0.316 | 0.113  |
| C    | -2.869 | -1.000 | 0.179  |
| C    | -1.543 | -0.464 | 0.077  |
| C    | -1.030 | 0.871  | -0.131 |
| H    | -3.572 | 1.688  | -0.269 |
| N    | 3.607  | 1.254  | 0.710  |
| N    | 2.735  | 0.366  | 0.117  |
| N    | 4.704  | -0.418 | -0.202 |
| N    | 5.694  | -1.324 | -0.534 |
| C    | 4.779  | 0.762  | 0.521  |



|   |       |        |        |
|---|-------|--------|--------|
| C | 3.381 | -0.633 | -0.435 |
| H | 6.303 | -0.939 | -1.247 |
| H | 6.231 | -1.557 | 0.293  |
| H | 1.664 | 0.616  | 0.046  |
| N | 5.977 | 1.207  | 1.030  |
| N | 2.911 | -1.660 | -1.149 |
| H | 6.699 | 1.348  | 0.335  |
| H | 5.846 | 2.042  | 1.585  |
| H | 3.555 | -2.423 | -1.287 |
| H | 1.932 | -1.886 | -0.998 |

**Table S17.** Geometry of No.13. Units are in angstrom.

| Atom | X      | Y      | Z      |
|------|--------|--------|--------|
| O    | 1.118  | -2.607 | -0.183 |
| O    | -0.806 | -1.473 | -0.099 |
| N    | 4.157  | 0.870  | 0.061  |
| N    | 5.474  | 1.024  | 0.055  |
| N    | 5.984  | -0.151 | -0.060 |
| N    | 5.029  | -1.088 | -0.131 |
| N    | 1.614  | 1.981  | 0.173  |
| N    | 0.810  | 3.048  | 0.257  |
| N    | -0.418 | 2.687  | 0.207  |
| N    | -0.446 | 1.363  | 0.087  |
| N    | 2.438  | -2.332 | -0.172 |

|   |        |        |        |
|---|--------|--------|--------|
| N | 0.417  | -1.431 | -0.098 |
| C | 3.892  | -0.437 | -0.054 |
| C | 2.567  | -1.043 | -0.086 |
| C | 1.274  | -0.431 | -0.036 |
| C | 0.820  | 0.935  | 0.068  |
| H | 3.485  | 1.640  | 0.139  |
| N | -3.855 | 1.482  | -0.575 |
| N | -3.057 | 0.516  | -0.053 |
| N | -5.096 | -0.131 | -0.079 |
| N | -6.228 | -0.905 | 0.055  |
| C | -3.848 | -0.494 | 0.253  |
| H | -6.868 | -0.450 | 0.697  |
| H | -6.675 | -0.993 | -0.850 |
| H | -1.383 | 0.876  | 0.029  |
| N | -3.538 | -1.663 | 0.846  |
| H | -4.245 | -2.380 | 0.796  |
| H | -2.576 | -1.958 | 0.761  |
| N | -5.066 | 1.121  | -0.599 |

**Table S18.** Geometry of No.14. Units are in angstrom.

| Atom | X      | Y      | Z      |
|------|--------|--------|--------|
| O    | -0.902 | -2.629 | 0.199  |
| O    | 1.066  | -1.571 | 0.131  |
| N    | -3.798 | 0.968  | -0.063 |

---

|   |        |        |        |
|---|--------|--------|--------|
| N | -5.107 | 1.175  | -0.073 |
| N | -5.665 | 0.020  | 0.024  |
| N | -4.750 | -0.955 | 0.098  |
| N | -1.211 | 1.976  | -0.149 |
| N | -0.364 | 3.010  | -0.229 |
| N | 0.848  | 2.600  | -0.183 |
| N | 0.822  | 1.275  | -0.070 |
| N | -2.211 | -2.301 | 0.177  |
| N | -0.155 | -1.481 | 0.119  |
| C | -3.587 | -0.350 | 0.043  |
| C | -2.287 | -1.008 | 0.088  |
| C | -0.971 | -0.448 | 0.049  |
| C | -0.462 | 0.898  | -0.050 |
| H | -3.096 | 1.712  | -0.125 |
| N | 4.242  | 1.294  | 0.532  |
| N | 3.419  | 0.333  | 0.046  |
| N | 5.445  | -0.350 | 0.041  |
| C | 4.184  | -0.694 | -0.260 |
| H | 1.733  | 0.749  | -0.017 |
| N | 3.797  | -1.859 | -0.837 |
| H | 4.384  | -2.661 | -0.681 |
| H | 2.807  | -2.047 | -0.753 |
| N | 5.445  | 0.910  | 0.539  |
| H | 6.308  | -0.853 | -0.074 |

**Table S19.** Geometry of No.15. Units are in angstrom.

| Atom | X      | Y      | Z      |
|------|--------|--------|--------|
| O    | 3.819  | -1.859 | 0.000  |
| O    | 2.214  | 2.141  | -0.000 |
| O    | 4.371  | 2.086  | 0.000  |
| N    | 4.264  | -0.613 | 0.000  |
| N    | 2.452  | -1.932 | 0.000  |
| N    | 0.749  | -0.275 | -0.000 |
| N    | -0.339 | -2.415 | -0.000 |
| N    | -1.624 | -2.730 | -0.000 |
| N    | -2.476 | -1.736 | -0.000 |
| N    | -1.343 | 1.745  | -0.000 |
| N    | -2.136 | 2.831  | -0.000 |
| N    | -3.370 | 2.492  | 0.000  |
| N    | -3.412 | 1.158  | 0.000  |
| N    | 3.288  | 1.573  | 0.000  |
| C    | 3.210  | 0.127  | 0.000  |
| C    | 2.039  | -0.695 | -0.000 |
| C    | -0.355 | -1.095 | -0.000 |
| C    | -1.699 | -0.661 | -0.000 |

|   |        |        |        |
|---|--------|--------|--------|
| C | -2.155 | 0.710  | -0.000 |
| H | -1.924 | -3.690 | -0.000 |
| H | 0.573  | 0.728  | -0.000 |
| H | -6.158 | -0.722 | -0.816 |
| H | -6.158 | -0.722 | 0.817  |
| H | -4.959 | -1.486 | 0.000  |
| H | -4.303 | 0.616  | 0.000  |
| N | -5.561 | -0.668 | 0.000  |

**Table S20.** Geometry of No.16. Units are in angstrom.

| Atom | X      | Y      | Z      |
|------|--------|--------|--------|
| O    | -4.060 | -1.965 | -0.009 |
| O    | -2.614 | 2.095  | -0.058 |
| O    | -4.766 | 1.954  | -0.128 |
| N    | -4.553 | -0.738 | -0.052 |
| N    | -2.692 | -1.983 | 0.032  |
| N    | -1.056 | -0.260 | 0.038  |
| N    | 0.115  | -2.356 | 0.099  |
| N    | 1.411  | -2.620 | 0.129  |
| N    | 2.222  | -1.592 | 0.127  |
| N    | 0.961  | 1.839  | 0.040  |
| N    | 1.712  | 2.954  | 0.040  |
| N    | 2.957  | 2.661  | 0.074  |
| N    | 3.050  | 1.329  | 0.098  |

|   |        |        |        |
|---|--------|--------|--------|
| N | -3.664 | 1.484  | -0.079 |
| C | -3.529 | 0.043  | -0.041 |
| C | -2.328 | -0.732 | 0.013  |
| C | 0.079  | -1.037 | 0.074  |
| C | 1.405  | -0.550 | 0.091  |
| C | 1.812  | 0.835  | 0.076  |
| H | 1.748  | -3.568 | 0.152  |
| H | -0.919 | 0.748  | 0.018  |
| H | 5.889  | -0.220 | 1.071  |
| H | 6.219  | 0.600  | -0.311 |
| H | 3.981  | 0.851  | 0.135  |
| N | 5.539  | 0.004  | 0.144  |
| N | 5.350  | -1.153 | -0.669 |
| H | 6.057  | -1.855 | -0.482 |
| H | 4.441  | -1.540 | -0.445 |

**Table S21.** Geometry of No.17. Units are in angstrom.

| Atom | X     | Y      | Z      |
|------|-------|--------|--------|
| O    | 5.307 | 1.601  | -0.166 |
| O    | 3.370 | -2.247 | -0.045 |
| O    | 5.520 | -2.373 | -0.190 |
| N    | 5.640 | 0.322  | -0.189 |
| N    | 3.952 | 1.794  | -0.078 |
| N    | 2.116 | 0.294  | 0.039  |

---

|   |        |        |        |
|---|--------|--------|--------|
| N | 1.215  | 2.527  | 0.095  |
| N | -0.035 | 2.946  | 0.193  |
| N | -0.962 | 2.014  | 0.274  |
| N | -0.125 | -1.561 | 0.263  |
| N | -1.014 | -2.543 | 0.333  |
| N | -2.212 | -2.039 | 0.390  |
| N | -2.147 | -0.704 | 0.356  |
| N | 4.484  | -1.770 | -0.119 |
| C | 4.527  | -0.324 | -0.119 |
| C | 3.432  | 0.596  | -0.046 |
| C | 1.091  | 1.213  | 0.114  |
| C | -0.276 | 0.880  | 0.225  |
| C | -0.853 | -0.445 | 0.279  |
| H | -0.257 | 3.926  | 0.199  |
| H | 1.840  | -0.687 | 0.072  |
| C | -4.649 | -0.575 | 0.224  |
| N | -4.571 | 0.713  | -0.117 |
| H | -4.527 | -2.199 | -1.096 |
| N | -4.451 | 0.818  | -1.471 |
| N | -4.530 | -0.330 | -1.959 |
| N | -4.693 | -1.214 | -0.942 |
| N | -4.747 | -1.082 | 1.450  |
| H | -4.224 | -1.951 | 1.542  |
| H | -4.495 | -0.400 | 2.157  |

|   |        |       |       |
|---|--------|-------|-------|
| N | -4.164 | 1.680 | 0.772 |
| H | -4.676 | 2.534 | 0.593 |
| H | -3.153 | 1.816 | 0.651 |

**Table S22.** Geometry of No.18. Units are in angstrom.

| Atom | X      | Y      | Z      |
|------|--------|--------|--------|
| O    | -6.204 | 1.353  | 0.009  |
| O    | -3.919 | -2.303 | 0.016  |
| O    | -6.052 | -2.622 | 0.018  |
| N    | -6.418 | 0.048  | 0.014  |
| N    | -4.870 | 1.672  | 0.005  |
| N    | -2.900 | 0.345  | 0.003  |
| N    | -2.211 | 2.647  | -0.012 |
| N    | -1.000 | 3.183  | -0.023 |
| N    | 0.015  | 2.354  | -0.027 |
| N    | -0.527 | -1.268 | 0.002  |
| N    | 0.404  | -2.209 | -0.000 |
| N    | 1.570  | -1.645 | -0.018 |
| N    | 1.449  | -0.316 | -0.029 |
| N    | -5.073 | -1.927 | 0.016  |
| C    | -5.247 | -0.491 | 0.012  |
| C    | -4.239 | 0.527  | 0.006  |
| C    | -1.955 | 1.352  | -0.008 |
| C    | -0.555 | 1.159  | -0.017 |



|   |        |        |        |
|---|--------|--------|--------|
| C | 0.139  | -0.112 | -0.016 |
| H | -0.872 | 4.180  | -0.028 |
| H | -2.536 | -0.607 | 0.007  |
| C | 4.718  | -0.850 | -0.005 |
| C | 6.083  | 0.879  | 0.032  |
| N | 4.052  | 0.284  | -0.017 |
| H | 2.987  | 0.336  | -0.031 |
| N | 4.896  | 1.379  | -0.004 |
| N | 6.039  | -0.506 | 0.039  |
| N | 4.236  | -2.083 | -0.084 |
| N | 7.270  | 1.536  | 0.136  |
| H | 8.067  | 1.039  | -0.230 |
| H | 7.224  | 2.513  | -0.109 |
| H | 4.824  | -2.852 | 0.188  |
| H | 3.178  | -2.160 | -0.048 |
| N | 7.145  | -1.330 | -0.019 |
| H | 7.243  | -1.864 | 0.836  |
| H | 7.088  | -1.943 | -0.824 |

**Table S23.** Geometry of No.19. Units are in angstrom.

| Atom | X      | Y      | Z      |
|------|--------|--------|--------|
| O    | -4.033 | -1.959 | -0.126 |
| O    | -2.578 | 2.097  | -0.074 |
| O    | -4.723 | 1.963  | -0.272 |

---

|   |        |        |        |
|---|--------|--------|--------|
| N | -4.522 | -0.731 | -0.193 |
| N | -2.670 | -1.980 | -0.009 |
| N | -1.034 | -0.259 | 0.095  |
| N | 0.131  | -2.355 | 0.225  |
| N | 1.424  | -2.619 | 0.319  |
| N | 2.235  | -1.594 | 0.346  |
| N | 0.996  | 1.845  | 0.181  |
| N | 1.760  | 2.953  | 0.177  |
| N | 3.001  | 2.650  | 0.238  |
| N | 3.077  | 1.316  | 0.286  |
| N | -3.627 | 1.490  | -0.160 |
| C | -3.498 | 0.049  | -0.120 |
| C | -2.303 | -0.729 | -0.002 |
| C | 0.097  | -1.035 | 0.189  |
| C | 1.421  | -0.550 | 0.265  |
| C | 1.833  | 0.833  | 0.248  |
| H | 1.760  | -3.567 | 0.357  |
| H | -0.899 | 0.750  | 0.085  |
| H | 6.136  | -0.592 | 0.461  |
| H | 3.975  | 0.798  | 0.327  |
| H | 4.665  | -1.322 | 0.386  |
| N | 5.203  | -0.520 | 0.067  |
| O | 5.357  | -0.720 | -1.325 |
| H | 5.063  | 0.101  | -1.727 |

**Table S24.** Geometry of No.20. Units are in angstrom.

| Atom | X      | Y      | Z      |
|------|--------|--------|--------|
| O    | -4.563 | -2.209 | 0.397  |
| O    | -3.559 | 1.967  | 0.048  |
| O    | -5.653 | 1.623  | 0.437  |
| N    | -5.172 | -1.037 | 0.459  |
| N    | -3.221 | -2.096 | 0.150  |
| N    | -1.796 | -0.225 | -0.185 |
| N    | -0.440 | -2.199 | -0.360 |
| N    | 0.858  | -2.340 | -0.577 |
| N    | 1.549  | -1.239 | -0.730 |
| N    | -0.007 | 2.064  | -0.559 |
| N    | 0.641  | 3.241  | -0.608 |
| N    | 1.902  | 3.060  | -0.730 |
| N    | 2.110  | 1.741  | -0.769 |
| N    | -4.526 | 1.260  | 0.249  |
| C    | -4.249 | -0.161 | 0.256  |
| C    | -2.993 | -0.816 | 0.056  |
| C    | -0.606 | -0.889 | -0.371 |
| C    | 0.647  | -0.278 | -0.602 |
| C    | 0.923  | 1.138  | -0.655 |
| H    | 1.293  | -3.248 | -0.619 |
| H    | -1.766 | 0.791  | -0.234 |
| C    | 4.239  | -0.355 | 0.513  |

|   |       |        |        |
|---|-------|--------|--------|
| N | 3.864 | 0.293  | 1.667  |
| N | 4.276 | -1.730 | 0.649  |
| N | 4.506 | 0.314  | -0.548 |
| H | 4.026 | -0.222 | 2.519  |
| H | 3.702 | -2.090 | 1.397  |
| H | 4.751 | -0.290 | -1.323 |
| H | 3.069 | 1.329  | -0.803 |
| N | 4.216 | -2.546 | -0.485 |
| H | 5.150 | -2.690 | -0.848 |
| H | 3.631 | -2.108 | -1.191 |
| N | 4.139 | 1.660  | 1.824  |
| H | 4.943 | 1.902  | 1.251  |
| H | 3.352 | 2.195  | 1.478  |

**Table S25.** Geometry of No.21. Units are in angstrom.

| Atom | X     | Y      | Z      |
|------|-------|--------|--------|
| O    | 5.210 | -0.427 | -0.664 |
| O    | 2.039 | 2.266  | 0.462  |
| O    | 3.940 | 3.247  | 0.191  |
| N    | 5.041 | 0.864  | -0.436 |
| N    | 4.069 | -1.157 | -0.456 |
| N    | 1.876 | -0.548 | 0.227  |
| N    | 1.787 | -2.883 | -0.340 |
| N    | 0.782 | -3.743 | -0.280 |

---

|   |        |        |        |
|---|--------|--------|--------|
| N | -0.359 | -3.290 | 0.181  |
| N | -0.697 | 0.220  | 1.192  |
| N | -1.804 | 0.808  | 1.638  |
| N | -2.771 | -0.064 | 1.680  |
| N | -2.335 | -1.256 | 1.273  |
| N | 3.230  | 2.281  | 0.215  |
| C | 3.807  | 0.990  | -0.084 |
| C | 3.165  | -0.290 | -0.087 |
| C | 1.246  | -1.772 | 0.121  |
| C | -0.105 | -2.019 | 0.457  |
| C | -1.052 | -1.054 | 0.987  |
| H | 0.900  | -4.704 | -0.553 |
| H | 1.302  | 0.212  | 0.588  |
| C | -3.547 | 1.178  | -0.723 |
| N | -4.833 | 0.823  | -0.602 |
| N | -3.220 | 2.444  | -0.423 |
| N | -2.614 | 0.372  | -1.221 |
| H | -5.472 | 1.573  | -0.386 |
| H | -3.804 | 2.908  | 0.256  |
| H | -1.666 | 0.539  | -0.893 |
| N | -1.933 | 2.966  | -0.498 |
| H | -1.601 | 2.967  | -1.453 |
| H | -1.310 | 2.469  | 0.137  |
| N | -5.270 | -0.428 | -0.135 |

|   |        |        |        |
|---|--------|--------|--------|
| H | -5.147 | -1.104 | -0.876 |
| H | -4.690 | -0.693 | 0.660  |
| N | -2.949 | -0.895 | -1.710 |
| H | -2.417 | -1.054 | -2.555 |
| H | -2.698 | -1.590 | -1.008 |

**Calculation script: 2-4.gjf**

%mem=20000MB

%chk=2-4.chk

%nproc=8

# M062X/6-311++g(3df,3pd) opt(tight) freq=noraman

Title Card Required

0 1

|   |   |           |           |           |
|---|---|-----------|-----------|-----------|
| 8 | 0 | -2.948213 | -0.627463 | -0.207363 |
| 8 | 0 | -2.781007 | 1.634452  | -0.339422 |
| 8 | 0 | 0.134607  | -2.960799 | 1.001893  |
| 8 | 0 | 1.116850  | -1.901761 | -0.632747 |
| 7 | 0 | -2.103521 | -1.684578 | -0.026614 |
| 7 | 0 | -2.161986 | 0.583320  | -0.201027 |
| 7 | 0 | 1.467349  | 0.974473  | 0.244721  |
| 7 | 0 | 2.044841  | 2.186429  | 0.354877  |
| 7 | 0 | 1.118239  | 3.126745  | 0.268757  |
| 7 | 0 | -0.091548 | 2.561614  | 0.097584  |

|   |   |           |           |           |
|---|---|-----------|-----------|-----------|
| 7 | 0 | 0.207111  | -2.077665 | 0.161390  |
| 6 | 0 | -0.914970 | -1.163344 | 0.057570  |
| 6 | 0 | -0.883642 | 0.247516  | -0.040578 |
| 6 | 0 | 0.164619  | 1.245009  | 0.086790  |
| 7 | 0 | 3.832238  | -0.984843 | -0.500940 |
| 1 | 0 | 3.192099  | -0.449590 | -0.175248 |
| 1 | 0 | 3.603088  | -1.729265 | -0.933645 |
| 1 | 0 | 4.341738  | -1.268010 | 0.172983  |
| 1 | 0 | 4.300070  | -0.482108 | -1.056918 |
